# Supplementary material for: A rod-like hexanuclear nickel cluster based on a bi(pyrazole-alcohol) ligand: structure, electrospray ionization mass spectrometry, magnetism and photocurrent response
Source: Royal Society of Chemistry journal article supplement (doi:10.1039/d0nj00959h), 2020-01-01
Supplement: d0nj00959h1.pdf [file d0nj00959h1.pdf]

## Supplementary Information

### **A rod-like hexanuclear nickel cluster based on bi(pyrazolyl-alcohol) ligand: Structure, electrospray ionization mass spectrometry, magnetism and photocurrent response**

Kai Sheng,<sup>a,b,†</sup> Bao-Qian Ji,<sup>a,†</sup> Lei Feng,<sup>a</sup> Yan-Min Su,<sup>a</sup> Marko Jagodič,<sup>\*,c</sup> Zvonko Jagličić,<sup>c</sup> and Di Sun<sup>\*,a</sup>

<sup>a</sup>Key Laboratory of Colloid and Interface Chemistry, Ministry of Education, School of Chemistry and Chemical Engineering, Shandong University, Jinan, 250100, P. R. China. Email: dsun@sdu.edu.cn

<sup>b</sup>School of Aeronautics, Shandong Jiaotong University, Jinan, 250037, P. R. China.

<sup>c</sup>Institute of Mathematics, Physics and Mechanics, Jadranska 19, 1000 Ljubljana, Slovenia. E-mail: marko.jagodic@imfm.si

<sup>†</sup>These authors contributed equally to this work.

## Experimental details

All reagents were used as received from commercial suppliers without further purification. C, H, and N analyses were performed on an EA1110 CHNS-0 CE 65 elemental analyzer. IR spectra were recorded on a PerkinElmer Spectrum Two in the frequency range of 500-4000  $\text{cm}^{-1}$ . Thermogravimetric analysis (TGA) was performed with a TA SDT Q600 thermal analyzer at a scanning rate of 20  $^{\circ}\text{C}/\text{min}$  under  $\text{N}_2$ , from 20 to 800  $^{\circ}\text{C}$ . The variable-temperature magnetic susceptibilities were measured using a Magnetic Property Measurement System (MPMS) and a SQUID-VSM (superconducting quantum interference device-vibrating sample magnetometer) (Quantum Design, USA). The solid-state UV-Vis diffuse reflectance spectrum was recorded on a UV/Vis spectrophotometer (Evolution 220, ISA-220 accessory, Thermo Scientific) using a built-in 10 mm silicon photodiode with a 60 mm Spectralon sphere. High-resolution mass spectra (HR-MS) were recorded on a Bruker impact II high definition mass spectrometer, quadrupole and time-of-flight (Q/TOF) modules in the positive ion mode. Typical measurement conditions are as follows: end plate offset = 500 V; dry gas = 4 L/min, nebulizer = 0.3 bar, capillary voltage = 4500 V, sample flow rate = 4  $\mu\text{L}/\text{min}$ . The data analyses of mass spectra were performed based on the isotope distribution patterns using Compass Data Analysis software (Version 4.4). The reported  $m/z$  values represent the monoisotopic mass of the most abundant peak within the isotope pattern. Photocurrent measurements were carried out using the CHI-660E electrochemical workstation in a three-electrode system. The samples (5 mg) of **SD/Ni6a** and naphthol (0.5 wt. %, 10  $\mu\text{L}$ ) were dispersed in 0.5 mL ethanol, and the mixture was sonicated for about 30 min. Then a 100  $\mu\text{L}$  solution was transferred by pipet and dropped on the cleaned ITO glass and the coated film was obtained after evaporation under ambient atmosphere. The prepared ITO glass film was used as working electrode, a Pt wire as the counter electrode, and an Ag/AgCl electrode as the reference electrode. A  $\text{Na}_2\text{SO}_4$  aqueous solution (0.2 M) was used as the medium. A 50 W LED lamp was used as the light source with 420 nm fixed wavelength.

### Synthesis of SD/Ni6a

Ni(OAc)<sub>2</sub>·4H<sub>2</sub>O (50 mg, 0.2 mmol), H<sub>2</sub>bdped (25 mg, 0.1mmol) were dissolved in 5 mL EtOH. 50 μL Et<sub>3</sub>N were added to the above solution. The mixture was then stired for 2 hours at room temperature and a dark green solution with few precipitate was finally obtained. After filtration, the filtrate was allowed to evaporate at ambient temperature undisturbed. Green block crystals were obtained in about 3 days with the yield 63% (based on Ni). Calcd. (found) for C<sub>52</sub>H<sub>100</sub>N<sub>8</sub>Ni<sub>6</sub>O<sub>30</sub> (**SD/Ni6a**), calcd. (found): C, 37.41 (37.39); H, 6.04 (6.01); N, 6.71 (6.73) %. IR:  $\nu$  = 3253 (w), 2948 (s), 1555 (w), 1404 (w), 1047 (m), 868 (m), 790 (s), 730 (m), 670 (m) cm<sup>-1</sup>.

## X-ray Crystallography

Single crystal of **SD/Ni6a** with appropriate dimensions was chosen under an optical microscope and quickly coated with high vacuum grease (Dow Corning Corporation) to prevent decomposition. Intensity data and cell parameters were recorded at 173 K on a Bruker Apex II single crystal diffractometer, employing a Mo K $\alpha$  radiation ( $\lambda = 0.71073 \text{ \AA}$ ) and a CCD area detector. The raw frame data were processed using SAINT and SADABS to yield the reflection data file.<sup>1</sup> The structure was solved using the charge-flipping algorithm, as implemented in the program *SUPERFLIP*<sup>2</sup> and refined by full-matrix least-squares techniques against  $F_o^2$  using the SHELXL program<sup>3</sup> through the OLEX2 interface.<sup>4</sup> Hydrogen atoms at carbon were placed in calculated positions and refined isotropically by using a riding model. Appropriate restraints or constraints were applied to the geometry and the atomic displacement parameters of the atoms in the cluster. The structure was examined using the Addsym subroutine of PLATON<sup>5</sup> to ensure that no additional symmetry could be applied to the models. Pertinent crystallographic data collection and refinement parameters are collated in [Table S1](#). Selected bond lengths and angles are collated in [Table S2](#).

**Table S1** Crystal Data of **SD/Ni6a**.

|                                             |                                                                                 |
|---------------------------------------------|---------------------------------------------------------------------------------|
| Empirical formula                           | C <sub>52</sub> H <sub>100</sub> N <sub>8</sub> Ni <sub>6</sub> O <sub>30</sub> |
| Formula weight                              | 1669.55                                                                         |
| Temperature/K                               | 173(2)                                                                          |
| Crystal system                              | monoclinic                                                                      |
| Space group                                 | <i>C2/c</i>                                                                     |
| a/Å                                         | 29.039(3)                                                                       |
| b/Å                                         | 12.0094(11)                                                                     |
| c/Å                                         | 22.276(2)                                                                       |
| $\alpha$ /°                                 | 90                                                                              |
| $\beta$ /°                                  | 111.4801(10)                                                                    |
| $\gamma$ /°                                 | 90                                                                              |
| Volume/Å <sup>3</sup>                       | 7229.0(11)                                                                      |
| Z                                           | 4                                                                               |
| $\rho_{\text{calc}}/\text{cm}^3$            | 1.532                                                                           |
| $\mu/\text{mm}^{-1}$                        | 1.616                                                                           |
| F(000)                                      | 3496.0                                                                          |
| Radiation                                   | MoK $\alpha$ ( $\lambda = 0.71073$ )                                            |
| 2 $\Theta$ range for data collection/°      | 3.712 to 55.108                                                                 |
| Index ranges                                | -37 $\leq$ h $\leq$ 29, -15 $\leq$ k $\leq$ 10, -28 $\leq$ l $\leq$ 28          |
| Reflections collected                       | 25420                                                                           |
| Independent reflections                     | 8325 [ $R_{\text{int}} = 0.0499$ , $R_{\text{sigma}} = 0.0661$ ]                |
| Data/restraints/parameters                  | 8325/0/448                                                                      |
| Goodness-of-fit on $F^2$                    | 1.024                                                                           |
| Final R indexes [ $I \geq 2\sigma(I)$ ]     | $R_1 = 0.0475$ , $wR_2 = 0.0908$                                                |
| Final R indexes [all data]                  | $R_1 = 0.0822$ , $wR_2 = 0.1046$                                                |
| Largest diff. peak/hole / e Å <sup>-3</sup> | 0.75/-0.50                                                                      |

**Table S2** The selected bond lengths [Å] and angles [°] for **SD/Ni6a**.

|                                        |             |                         |             |
|----------------------------------------|-------------|-------------------------|-------------|
| Ni1—O3 <sup>i</sup>                    | 2.029 (2)   | Ni2—O6                  | 2.059 (2)   |
| Ni1—O5                                 | 2.057 (2)   | Ni2—O9                  | 2.054 (2)   |
| Ni1—O9                                 | 2.042 (2)   | Ni2—O10                 | 2.046 (2)   |
| Ni1—O9 <sup>i</sup>                    | 2.090 (2)   | Ni3—O2                  | 2.036 (3)   |
| Ni1—N2                                 | 2.062 (3)   | Ni3—O4                  | 2.136 (2)   |
| Ni1—N3                                 | 2.088 (3)   | Ni3—O7                  | 2.060 (2)   |
| Ni2—O1                                 | 2.011 (2)   | Ni3—O10                 | 2.067 (2)   |
| Ni2—O4                                 | 2.078 (2)   | Ni3—O11                 | 2.068 (2)   |
| Ni2—O5 <sup>i</sup>                    | 2.092 (2)   | Ni3—O12                 | 2.070 (3)   |
| O3 <sup>i</sup> —Ni1—O5                | 88.32 (9)   | O9—Ni2—O4               | 90.46 (9)   |
| O3 <sup>i</sup> —Ni1—O9 <sup>i</sup>   | 93.38 (9)   | O9—Ni2—O5 <sup>i</sup>  | 80.21 (8)   |
| O3 <sup>i</sup> —Ni1—O9                | 170.04 (10) | O9—Ni2—O6               | 97.24 (9)   |
| O3 <sup>i</sup> —Ni1—N2                | 93.47 (11)  | O10—Ni2—O4              | 82.08 (9)   |
| O3 <sup>i</sup> —Ni1—N3                | 99.49 (10)  | O10—Ni2—O5 <sup>i</sup> | 161.50 (9)  |
| O5—Ni1—O9 <sup>i</sup>                 | 80.18 (9)   | O10—Ni2—O6              | 99.61 (9)   |
| O5—Ni1—N2                              | 177.74 (11) | O10—Ni2—O9              | 82.50 (8)   |
| O5—Ni1—N3                              | 91.31 (10)  | O2—Ni3—O4               | 90.16 (9)   |
| O9—Ni1—O5                              | 98.25 (9)   | O2—Ni3—O7               | 90.32 (10)  |
| O9—Ni1—O9 <sup>i</sup>                 | 80.48 (8)   | O2—Ni3—O10              | 90.30 (10)  |
| O9—Ni1—N2                              | 79.79 (10)  | O2—Ni3—O11              | 86.63 (10)  |
| O9—Ni1—N3                              | 87.89 (10)  | O2—Ni3—O12              | 171.94 (10) |
| N2—Ni1—O9 <sup>i</sup>                 | 98.33 (10)  | O7—Ni3—O4               | 172.31 (9)  |
| N2—Ni1—N3                              | 89.76 (11)  | O7—Ni3—O10              | 92.11 (9)   |
| N3—Ni1—O9 <sup>i</sup>                 | 164.38 (10) | O7—Ni3—O11              | 89.92 (9)   |
| O1—Ni2—O4                              | 87.86 (10)  | O7—Ni3—O12              | 90.24 (10)  |
| O1—Ni2—O5 <sup>i</sup>                 | 97.92 (9)   | O10—Ni3—O4              | 80.22 (8)   |
| O1—Ni2—O6                              | 84.43 (10)  | O10—Ni3—O11             | 176.34 (10) |
| O1—Ni2—O9                              | 177.45 (10) | O10—Ni3—O12             | 97.71 (10)  |
| O1—Ni2—O10                             | 99.15 (9)   | O11—Ni3—O4              | 97.77 (9)   |
| O4—Ni2—O5 <sup>i</sup>                 | 91.50 (9)   | O11—Ni3—O12             | 85.33 (10)  |
| O6—Ni2—O4                              | 172.27 (10) | O12—Ni3—O4              | 90.36 (9)   |
| O6—Ni2—O5 <sup>i</sup>                 | 89.09 (9)   |                         |             |
| Symmetry code: (i) $-x+1, y, -z+1/2$ . |             |                         |             |

**Figure S1** The inter- and intra-cluster hydrogen bonds (green dashed lines) in **SD/Ni6a**. The Hirshfeld surface of **SD/Ni6a** was generated by CrystalExplorer 17.5.<sup>6</sup> In all cases red represents the closest contacts, and blue the most distant contacts. Color legend: Ni, green; N, blue; O, red; C, grey; H, white.

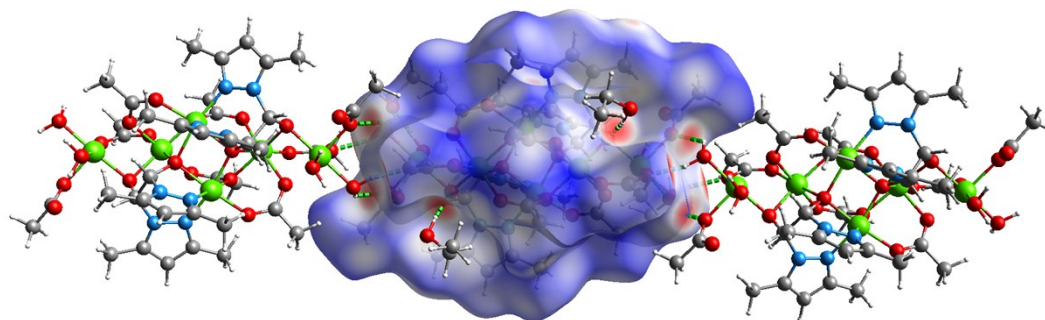

**Table S3** Hydrogen bond length [ $\text{\AA}$ ] and angles [ $^\circ$ ] in **SD/Ni6a** (D and A represent hydrogen bonding donor and acceptor, respectively).

| D-H $\cdots$ A        | D-H  | H $\cdots$ A | D $\cdots$ A | D-H $\cdots$ A |
|-----------------------|------|--------------|--------------|----------------|
| O11-H11A $\cdots$ O2  | 0.85 | 1.90         | 2.734(4)     | 165.8          |
| O11-H11B $\cdots$ O7  | 0.85 | 2.07         | 2.690(4)     | 129.5          |
| O12-H12B $\cdots$ O8  | 0.89 | 1.82         | 2.6177(5)    | 148.8          |
| O12-H12A $\cdots$ O15 | 0.88 | 1.84         | 2.717(4)     | 173.9          |
| O13-H13 $\cdots$ O14  | 0.84 | 2.00         | 2.665(4)     | 135.7          |
| O14-H14 $\cdots$ O10  | 0.84 | 2.01         | 2.823(4)     | 162.2          |
| O15-H15 $\cdots$ O13  | 0.84 | 1.90         | 2.782(5)     | 172.4          |



**Table S4** Identification of the key species in ESI-MS of **SD/Ni6a**.

| Species   | Molecular formula                                                                              | Exp. <i>m/z</i> | Sim. <i>m/z</i> |
|-----------|------------------------------------------------------------------------------------------------|-----------------|-----------------|
| <b>1a</b> | $[\text{Ni}_4(\text{OAc})_7(\text{H}_2\text{O})_4(\text{EtOH})_2]^+$                           | 810.959         | 810.956         |
| <b>1b</b> | $[\text{Ni}_4(\text{OAc})_7(\text{H}_2\text{O})_6(\text{EtOH})_2]^+$                           | 846.966         | 846.977         |
| <b>1c</b> | $[\text{Ni}_4(\text{OAc})_7(\text{H}_2\text{O})_3(\text{EtOH})_3(\text{MeOH})]^+$              | 870.939         | 871.013         |
| <b>1d</b> | $[\text{Ni}_4(\text{bdped})_2(\text{OAc})_3]^+$                                                | 907.028         | 907.031         |
| <b>1e</b> | $[\text{Ni}_5(\text{CH}_3\text{COO})_9(\text{H}_2\text{O})_2(\text{EtOH})_2(\text{MeOH})_3]^+$ | 1046.945        | 1046.975        |
| <b>1f</b> | $[\text{Ni}_5(\text{bdped})_2(\text{OAc})_5]^+$                                                | 1082.990        | 1082.993        |
| <b>1g</b> | $[\text{Ni}_5(\text{bdped})(\text{OAc})_7(\text{H}_2\text{O})_8(\text{EtOH})]^+$               | 1142.960        | 1143.019        |
| <b>1h</b> | $[\text{Ni}_5(\text{bdped})_2(\text{OAc})_5(\text{H}_2\text{O})_2(\text{EtOH})]^+$             | 1165.023        | 1165.056        |
| <b>1i</b> | $[\text{Ni}_5(\text{bdped})(\text{OAc})_7(\text{H}_2\text{O})_5(\text{EtOH})_3]^+$             | 1180.998        | 1181.071        |
| <b>1j</b> | $[\text{Ni}_6(\text{bdped})_2(\text{OAc})_7]^+$                                                | 1260.952        | 1260.951        |
| <b>1k</b> | $[\text{Ni}_6(\text{bdped})_2(\text{OAc})_7(\text{H}_2\text{O})_2(\text{EtOH})]^+$             | 1342.990        | 1343.015        |
| <b>1l</b> | $[\text{Ni}_6(\text{bdped})(\text{OAc})_9(\text{H}_2\text{O})_5(\text{EtOH})_3]^+$             | 1358.989        | 1359.029        |

**Figure S2** The TGA of SD/Ni6a.

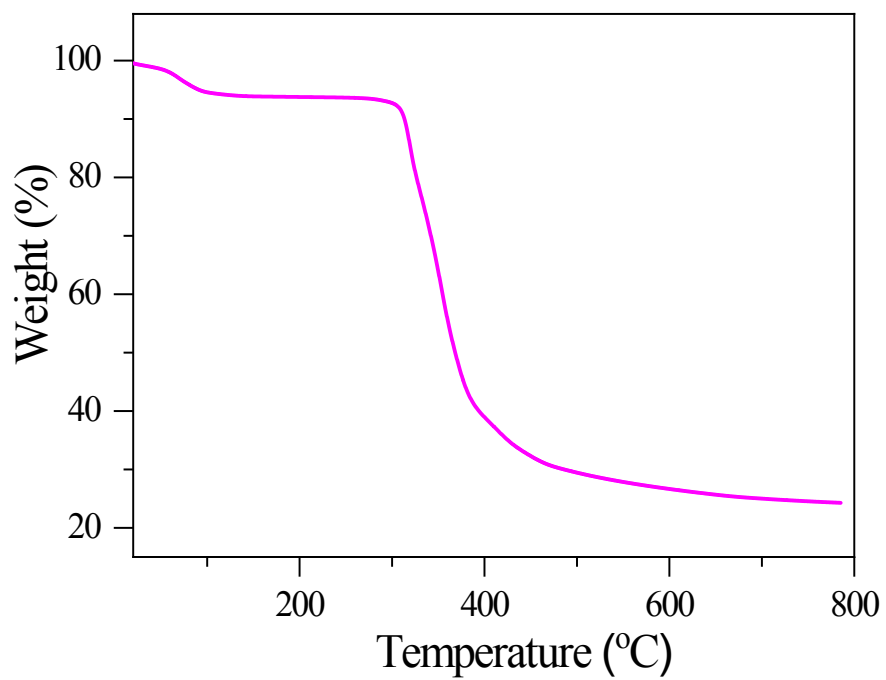

Figure S3 IR spectrum of SD/Ni6a.

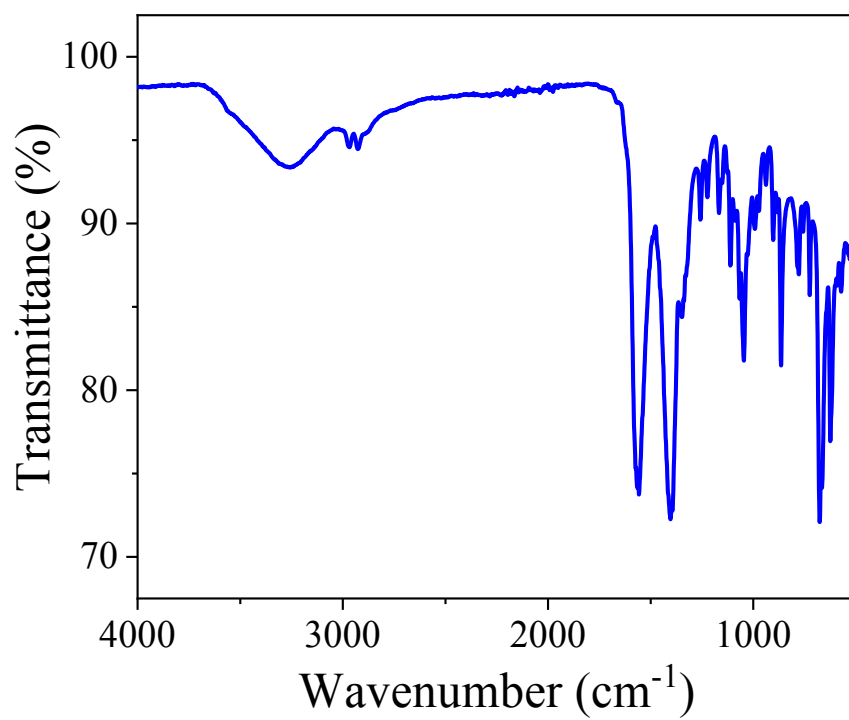

**Figure S4** The picture of bulky sample of **SD/Ni6a**.

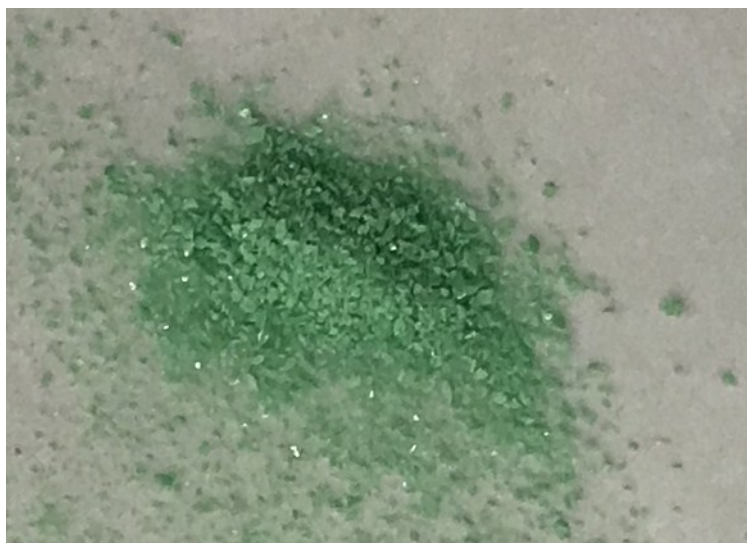

## References

1. *APEX3, SAINT and SADABS*. Bruker AXS Inc., Madison, Wisconsin, USA, 2015.
2. L. Palatinus and G. Chapuis, *J. Appl. Crystallogr.* 2007, **40**, 786.
3. G. M. Sheldrick, *Acta Crystallogr., C: Struct. Chem.* 2015, **71**, 3-8.
4. O. V. Dolomanov, L. J. Bourhis, R. J. Gildea, J. A. K. Howard and H. Puschmann, *J. Appl. Crystallogr.* 2009, **42**, 339.
5. A. L. Spek, *Acta. Crystallogr. Sect. D.* 2009, **65**, 148.
6. M. J. Turner, J. J. McKinnon, S. K. Wolff, D. J. Grimwood, P. R. Spackman, D. Jayatilaka and M. A. Spackman, *CrystalExplorer17* (2017). University of Western Australia.  
<http://hirshfeldsurface.net>.
